# Supplementary material for: Schmerzmittelgebrauch in Deutschland
Source: Springer Nature journal article supplement (doi:10.1007/s00482-022-00661-x), 2022-07-21
Supplement: MOESM1 [file 23290924]

## Zusatz-Tabelle

| Jahr | M01A<br>Rx | M01A<br>OTC | N02B<br>Rx | N02B OTC    |           |      |            |                                                             |                               |                              |                                         |
|------|------------|-------------|------------|-------------|-----------|------|------------|-------------------------------------------------------------|-------------------------------|------------------------------|-----------------------------------------|
|      |            |             |            | Paracetamol | Ibuprofen | ASS  | Diclofenac | Sonstige (z. B.<br>Naproxen,<br>Propyphenazon,<br>Phenazon) | Kombinationen<br>ohne Coffein | Kombinationen<br>mit Coffein | Homöopathische<br>und Phyto-<br>Medizin |
| 2008 | 19,61      | 0,27        | 20,10      | 7,57        | 6,62      | 4,37 | 0,75       | 0,09                                                        | 3,28                          | 4,94                         | 0,04                                    |
| 2009 | 19,88      | 0,17        | 19,52      | 7,55        | 7,49      | 3,97 | 0,79       | 0,07                                                        | 3,04                          | 4,60                         | 0,04                                    |
| 2010 | 20,30      | 0,14        | 19,99      | 7,21        | 7,93      | 3,64 | 0,82       | 0,06                                                        | 2,74                          | 4,31                         | 0,04                                    |
| 2011 | 20,80      | 0,12        | 21,35      | 7,12        | 9,21      | 3,48 | 0,86       | 0,06                                                        | 2,42                          | 4,00                         | 0,04                                    |
| 2012 | 20,52      | 0,10        | 21,38      | 6,24        | 9,71      | 3,04 | 0,83       | 0,06                                                        | 2,09                          | 3,66                         | 0,04                                    |
| 2013 | 20,72      | 0,09        | 22,12      | 6,66        | 10,75     | 2,76 | 0,91       | 0,06                                                        | 1,90                          | 3,48                         | 0,04                                    |
| 2014 | 20,42      | 0,09        | 23,32      | 6,14        | 11,22     | 2,63 | 0,92       | 0,05                                                        | 1,64                          | 3,27                         | 0,04                                    |
| 2015 | 20,13      | 0,08        | 23,94      | 6,04        | 11,99     | 2,31 | 0,86       | 0,05                                                        | 1,53                          | 3,03                         | 0,04                                    |
| 2016 | 19,95      | 0,10        | 25,09      | 5,75        | 12,66     | 2,06 | 0,81       | 0,05                                                        | 1,38                          | 2,81                         | 0,09                                    |
| 2017 | 18,87      | 0,10        | 25,97      | 5,55        | 12,94     | 1,87 | 0,78       | 0,05                                                        | 1,25                          | 2,59                         | 0,20                                    |
| 2018 | 18,27      | 0,10        | 26,77      | 5,64        | 13,83     | 1,76 | 0,77       | 0,05                                                        | 1,17                          | 2,39                         | 0,33                                    |
| 2019 | 17,85      | 0,08        | 27,76      | 5,52        | 14,47     | 1,57 | 0,78       | 0,04                                                        | 1,10                          | 2,42                         | 0,32                                    |

Pro-Kopf Gebrauch (in „Zähleinheiten“, ZU) von Analgetika des ATC-Codes M01A und N02B über die Jahre 2008 bis 2019. Angaben sind auf zwei Nachkommastellen gerundet. Datenbasis: IQVIA Pharmascope® National; Bevölkerungsdaten des Statistischen Bundesamtes.
